# Supplementary material
Source: Springer Nature journal article supplement (https://www.springermedizin.de/resource/supplementary/12883_2010_320_MOESM1_ESM.pdf/9455142)
Supplement: MOESM1 [file 9455142]

**INSTRUCTIONS:** The questions below refer to the headaches or migraine episodes without headache that you may have experienced in your lifetime. Answer each question as indicated. If you are not sure how to answer a given question, please answer what you believe is most correct.

---

- |                                                                         |              |
|-------------------------------------------------------------------------|--------------|
| 1. Do you have frequent or intense headaches?                           | 0. No 1. Yes |
| 2. Do your headaches usually last more than 4 hours?                    | 0. No 1. Yes |
| 3. Do you usually suffer from nausea when you have a headache?          | 0. No 1. Yes |
| 4. Does light or noise bother you when you have a headache?             | 0. No 1. Yes |
| 5. Does headache limit any of your physical or intellectual activities? | 0. No 1. Yes |
-
